# Supplementary material for: A Novel Deoxynivalenol-Activated Wheat Arl6ip4 Gene Encodes an Antifungal Peptide with Deoxynivalenol Affinity and Protects Plants against Fusarium Pathogens and Mycotoxins
Source: MDPI journal article supplement (doi:10.3390/jof7110941), 2021-11-06
Supplement: s1 [file s1]

## Supplementary Materials

Supplementary materials for the article “A Novel Deoxynivalenol-Activated Wheat *Arl6ip4* Gene Encodes An Antifungal Peptide with Deoxynivalenol Affinity and Protects Plants against *Fusarium* Pathogens and Mycotoxins”

Gang Liu <sup>1,2,†</sup>, Dong-Yun Zuo <sup>1,2,3†</sup>, Peng Yang <sup>1,2</sup>, Wei-Jie He <sup>1,2</sup>, Zheng Yang <sup>1,2</sup>, Jing-Bo Zhang <sup>1,2</sup>, Ai-Bo Wu <sup>5</sup>, Shu-Yuan Yi <sup>1,2,6</sup>, He-Ping Li <sup>1,4</sup>, Tao Huang <sup>1,4,\*</sup> and Yu-Cai Liao <sup>1,2,\*</sup>

\* Correspondence 1: Yu-Cai Liao, College of Plant Science and Technology, Huazhong Agricultural University, Wuhan 430070, China.

E-mail: yucailiao@mail.hzau.edu.cn

\* Correspondence 2: Tao Huang, College of Life Science and Technology, Huazhong Agricultural University, Wuhan 430070, China.

E-mail: hhttao@mail.hzau.edu.cn

## A TABLE OF CONTENTS

**Figure S1** PCR amplification of *TaArl6ip4* using of 3'-RACE and 5'-RACE from the wheat Zhengmai9023 cDNA.

**Figure S2** Phylogenetic tree analysis of deduced TaARL6IP4 amino acid sequence together with ARL6IP4 proteins from 19 plant species.

**Figure S3** Southern blotting and Northern blotting analysis of the *TaArl6ip4* gene in wheat.

**Figure S4** Molecular characterization of *TaArl6ip4* T<sub>2</sub> generation transgenic lines in *Arabidopsis* plants.

**Table S1** Primer sequences used in this study.

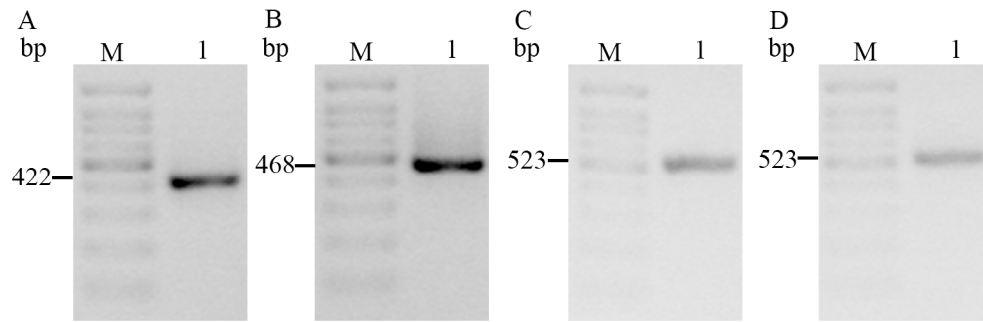

**Figure S1** PCR amplification of *TaArl6ip4* using of 3'-RACE and 5'-RACE from the wheat Zhengmai9023 cDNA.

Lane M: Marker 3000 bp; A, lane 1 represents the product of *TaArl6ip4* 3'-RACE; B, lane 1 represents the product of *TaArl6ip4* 5'-RACE; C, lane 1 represents the full-length *TaArl6ip4* PCR product using cDNA as a template; D, lane 1 represents the full-length *TaArl6ip4* PCR product using genomic DNA as a template. All the PCR products were electrophoresed on 1% agarose gels.

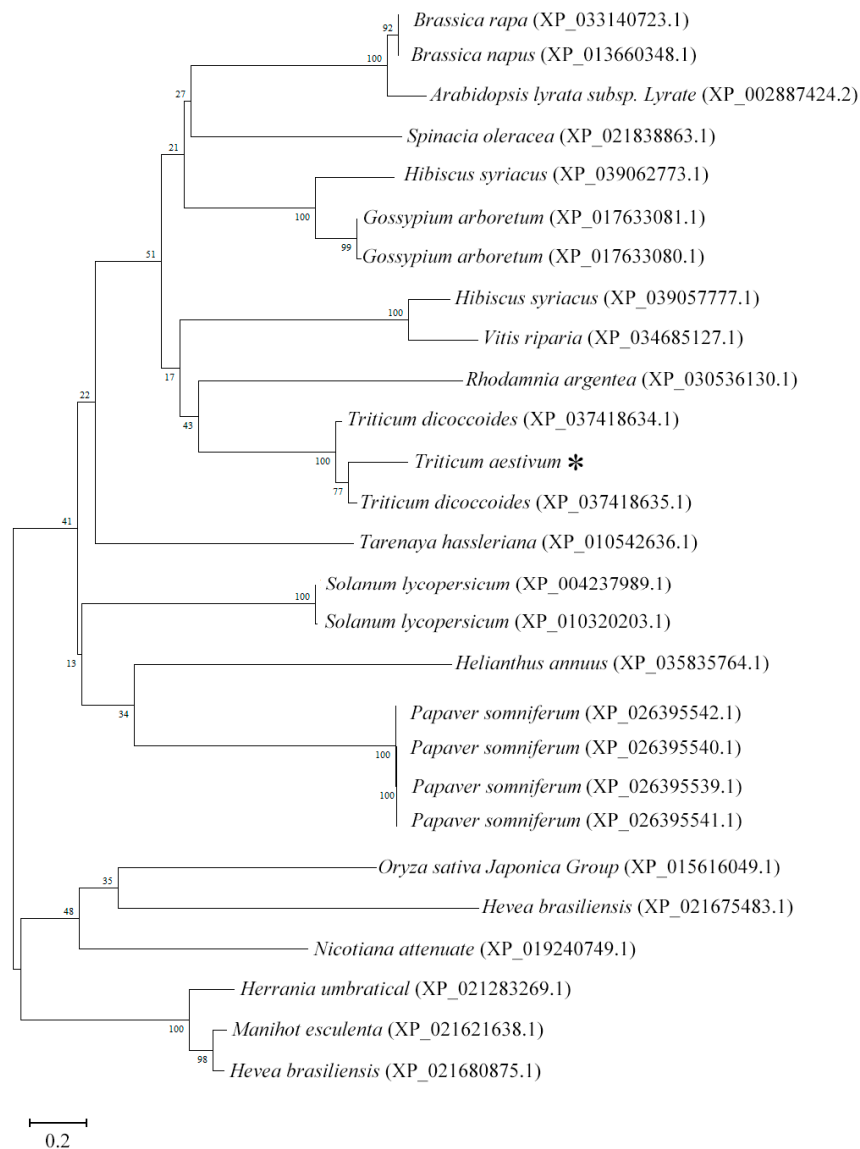

**Figure S2** Phylogenetic tree analysis of deduced TaARL6IP4 amino acid sequence together with ARL6IP4 proteins from 19 plant species. *Arabidopsis* (Accession: XP\_002887424.2), *Oryza sativa Japonica Group* (XP\_015616049.1), *Triticum dicoccoides* (XP\_037418635.1, XP\_037418634.1), *Brassica rapa* (XP\_033140723.1), *Brassica napus* (XP\_013660348.1), *Hibiscus syriacus* (XP\_039062773.1, XP\_039057777.1), *Manihot esculenta* (XP\_021621638.1), *Helianthus annuus* (XP\_035835764.1), *Vitis riparia* (XP\_034685127.1), *Rhodamnia argentea* (XP\_030536130.1), *Solanum lycopersicum* (XP\_004237989.1), *Spinacia oleracea* (XP\_021838863.1), *Hevea brasiliensis* (XP\_021680875.1, XP\_021675483.1), *Herrania umbratica* (XP\_021283269.1), *Tarenaya hassleriana* (XP\_010542636.1), *Gossypium arboreum* (XP\_017633080.1, XP\_017633081.1), *Nicotiana attenuate* (XP\_019240749.1), *Papaver somniferum* (XP\_026395539.1, XP\_026395540.1, XP\_026395541.1, XP\_026395542.1) and *Solanum lycopersicum* (XP\_010320203.1). Amino acid sequences of ARL6IP4 proteins from different plant species were used to generate the phylogenetic tree using MEGA 11 with the neighbor-joining method. The ‘\*’ represents amino acid sequence derived from coding sequence of *Triticum aestivum TaArl6ip4* (Accession: OK345034) in the current study.

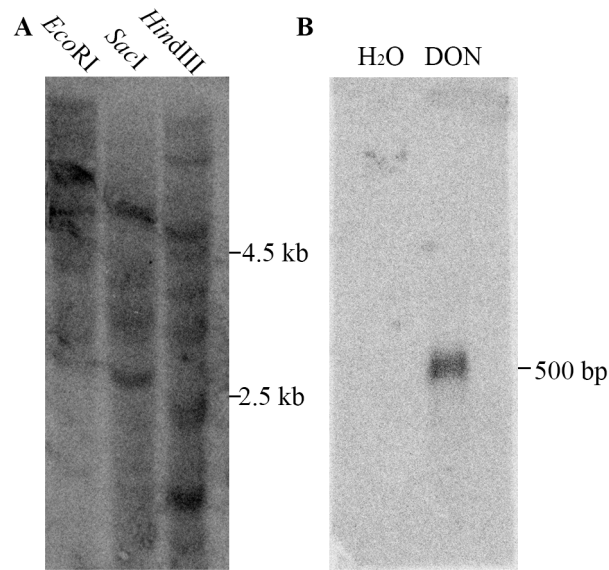

**Figure. S3** Southern blotting and Northern blotting analysis of the *TaArl6ip4* gene in wheat.

A, Southern blotting analysis of the *TaArl6ip4* gene expression in wheat. The Zhengmai9023 genomic DNA was digested with *EcoRI*, *SacI* and *HindIII*, electrophoresis was performed on 0.8% agarose gel and transferred onto nylon membranes and hybridized with a *TaArl6ip4* probe. B, Northern blotting analysis of the *TaArl6ip4* gene expression in wheat. Total RNAs were extracted from water-treated (control), and 50  $\mu\text{g ml}^{-1}$  DON-treated wheat spikelets at 24 hpi, 20  $\mu\text{g}$  RNAs were run on 1.2% agarose/formaldehyde gel and transferred onto nylon membranes and hybridized with a *TaArl6ip4* probe.

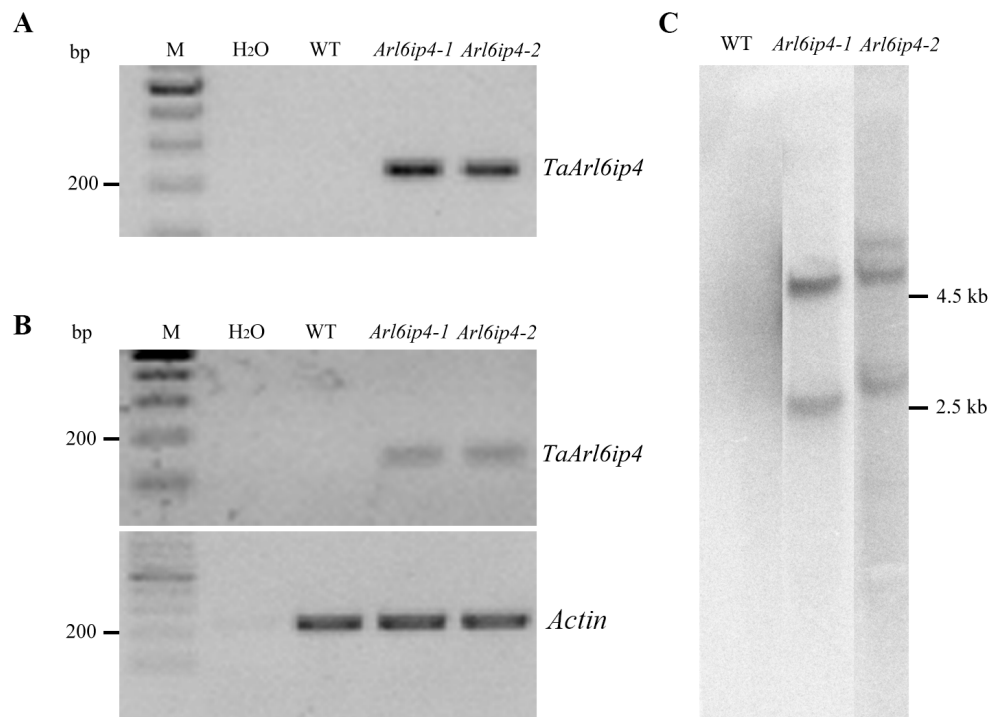

**Figure S4** Molecular characterization of *TaArl6ip4* T<sub>2</sub> generation transgenic lines in *Arabidopsis* plants

A, PCR analysis of the transgenic plants *TaArl6ip4-1* and *TaArl6ip4-2* with gene specific primers (UTR/*TaArl6ip4*-R4-b); B, RT-PCR analysis of the transgenic plants *TaArl6ip4-1* and *TaArl6ip4-2* with primers (*TaArl6ip4*-F5/ *TaArl6ip4*-R5), the constitutively expressed  $\beta$ -actin gene (*Actin*-F/ *Actin*-R) was used as a reference gene; C, Southern blotting analysis of the transgenic plants *TaArl6ip4-1* and *TaArl6ip4-2*.

**Table S1** Primer sequences used in this study

| Primers               | Sequences (5'-3')                                         |
|-----------------------|-----------------------------------------------------------|
| 5'RACE-F1             | CTAATACGACTCACTATAGGGCAAGCAGTGGTATCAACGCAGAGT             |
| 5'-RACE R1            | TCTTCAGCGGAACAACCGAGGCAAA                                 |
| 5'RACE-F2             | AAGCAGTGGTATCAACGCAGAGT                                   |
| 5'-RACE R2            | CCGGGCGTAAGCTAATAAGAGAAC                                  |
| 3'-RACE F1            | AGGGACGGGGAAATTTTAGTGGTGTA                                |
| 3'RACE R1             | GCTGTCAACGATACGCTACGTAACG                                 |
| 3'-RACE F2            | ATGGGGTTTTGCTGTGGGTGTTC                                   |
| 3' RACE-R2            | CGCTACGTAACGGCATGACAGTG                                   |
| <i>TaArl6ip4</i> -F3  | ACATGGGGACAGAAACACATCAAGCA                                |
| <i>TaArl6ip4</i> -R3  | GGATCAACCGACCGTCCATGAATAA                                 |
| UTR                   | CGCGAATTCACAACACAAATCAGATTTATAGAGAGATTTATAAAAAAA<br>AAAAA |
| <i>TaArl6ip4</i> -F4  | TTATAAAAAAAAAAAAAAATGGGGTTTTGCTGTG                        |
| <i>TaArl6ip4</i> -R4a | AGCGGATCCCATTAGGCCGGGTCGA                                 |
| <i>TaArl6ip4</i> -R4b | ATGCGGATCCTTACATTAGGCCGGGTCGAGAA                          |
| <i>TaArl6ip4</i> -F5  | GCTGTGGGTGTTTCGGATGTC                                     |
| <i>TaArl6ip4</i> -R5  | TTTCCTTCCTTCTTTACGG                                       |
| <i>Actin</i> -F       | CAGCAATGTATGTCGCAATC                                      |
| <i>Actin</i> -R       | TAGCATGAGGAAGCGTGTAT                                      |
| <i>TaArl6ip4</i> -F6  | TCCAGGGGCCCCCTGGGATCCATGGGG<br>TTTTGCTGTGGGTGTT           |
| <i>TaArl6ip4</i> -R6  | CTCGAGTCGACCCGGAATTCTTACAT<br>TAGGCCGGGTCGAGAATG          |
